# Supplementary material for: Polyoxometalates encapsulated into hollow double-shelled nanospheres as amphiphilic nanoreactors for an effective oxidative desulfurization
Source: Royal Society of Chemistry journal article supplement (doi:10.1039/d0nr03951a), 2020-01-01
Supplement: d0nr03951a1.pdf [file d0nr03951a1.pdf]

Supporting Information

**Polyoxometalates encapsulated into hollow double-shelled  
nanospheres as amphiphilic nanoreactors for effective  
oxidative desulfurization**

*Huifang Liu, Zhen Li, Jing Dong, Dan Liu, Chengpeng, Liu, Yingnan Chi, \* Changwen Hu*

**Table S1.** Surface area and porosity data of  $\text{PMo}_{12}/\text{AmHMSiO}_2@\text{C}$ ,  $\text{AmHMSiO}_2@\text{C}$  and  $\text{HMSiO}_2@\text{C}$ .

| <b>Materials</b>                            | <b>Surface area</b><br><b>(<math>\text{m}^2/\text{g}</math>)</b> | <b>Pore volume</b><br><b>(<math>\text{cm}^3/\text{g}</math>)</b> | <b>Average pore</b><br><b>Diameter (<math>\text{\AA}</math>)</b> |
|---------------------------------------------|------------------------------------------------------------------|------------------------------------------------------------------|------------------------------------------------------------------|
| $\text{PMo}_{12}/\text{AmHMSiO}_2@\text{C}$ | 57                                                               | 0.54                                                             | 0.8                                                              |
| $\text{AmHMSiO}_2@\text{C}$                 | 229                                                              | 0.77                                                             | 2.4                                                              |
| $\text{HMSiO}_2@\text{C}$                   | 740                                                              | 1.57                                                             | 2.5                                                              |

**Table S2.** The elemental analysis of  $\text{PMo}_{12}/\text{AmHMSiO}_2@\text{C}$  nanoreactor.

| <b>Sample</b>                                     | <b>Mo</b> | <b>P</b> | <b>C</b> | <b>H</b> | <b>N</b> |
|---------------------------------------------------|-----------|----------|----------|----------|----------|
| $\text{PMo}_{12}/\text{AmHMSiO}_2@\text{C}$ (wt%) | 14.19     | 5.91     | 17.89    | 2.38     | 1.62     |

**Table S3.** Comparison of heterogeneous catalysts for oxidation of DBT.

| Catalyst                                                                                         | H <sub>2</sub> O <sub>2</sub> /DBT<br>mol/mol | Temp.<br>(°C) | Time<br>(h) | Conv.<br>(%) | Ref.      |
|--------------------------------------------------------------------------------------------------|-----------------------------------------------|---------------|-------------|--------------|-----------|
| PMo <sub>12</sub> /AmHMSi@C                                                                      | 3                                             | 40            | 3           | >99          | This work |
| SiO <sub>2</sub> @C-dots/PW <sub>12</sub> <sup>[a]</sup>                                         | 3                                             | 50            | 3           | 100          | 1         |
| Ti(IV)/SiO <sub>2</sub>                                                                          | 5                                             | 60            | 8           | >99          | 2         |
| Zr(IV)/PMMA <sup>[b]</sup>                                                                       | 3.5                                           | 65            | 24          | 84           | 3         |
| [Cu(dpa)(acac)] <sub>2</sub> [V <sub>6</sub> O <sub>11</sub> (OMe) <sub>8</sub> ] <sup>[c]</sup> | 4                                             | 40            | 6           | 100          | 4         |
| PW <sub>11</sub> Zn-MOF <sup>[d]</sup>                                                           | 50                                            | 50            | 6           | 100          | 5         |
| PMo <sub>12</sub> /BzPN-SiO <sub>2</sub> <sup>[e]</sup>                                          | 3                                             | 60            | 3           | 100          | 6         |

[a] SiO<sub>2</sub>@C-dots loading calcined PW<sub>12</sub> in octane-acetonitrile system.

[b] Zr oxoclusters reinforced poly(methylmethacrylate) (PMMA) in octane-acetonitrile system.

[c] Alkoxohexavanadate-based Cu-complex in decalin-acetonitrile biphasic system.

[d] PW<sub>11</sub>Zn@MOF in octane-[BIMIM] PF<sub>6</sub> system.

[e] PMo<sub>12</sub> immobilized on phosphazene-functionalized silica in octane-H<sub>2</sub>O system.

The conversion of DBT, H<sub>2</sub>O<sub>2</sub>/DBT molar ratio, reaction temperature and reaction time from recent investigations were summarized in (Table S3). For example, a core-shell catalyst, SiO<sub>2</sub>@C-dots/PW<sub>12</sub>, synthesized by loading PW<sub>12</sub> and carbon dots on a solid silica core, can convert 100% of DBT in 3 h at 50 °C, but after three recycles its catalytic activity decreased to 80.4%. 99% of DBT was oxidized by titanium grafted on silica at 60 °C with H<sub>2</sub>O<sub>2</sub>/DBT molar ratio of 5, but a long reaction time (8 h) was needed. For Zr(IV)/poly(methylmethacrylate) (PMMA), after 24 h only a conversion of 84% was obtained at 65°C. Recently, an alkoxohexavanadate-based catalyst was synthesized in our group and at 40 °C DBT can be completely removed in 6 h. The PW<sub>11</sub>Zn@MOF composite gave 100% conversion of DBT at 50 °C in 6 h, but a large amount of excess H<sub>2</sub>O<sub>2</sub> was used. The PMo<sub>12</sub>/BzPN-SiO<sub>2</sub> can convert 100% DBT in 3 h, but the oxidative desulfurization was performed at 60°C. In comparison, our PMo<sub>12</sub>/AmHMSiO<sub>2</sub>@C nanoreactor converts >99% of DBT in 3 h with H<sub>2</sub>O<sub>2</sub>/DBT molar ratio of 3 and the temperature (40 °C) in our catalytic reaction is lower than that in most other reports. Importantly, both catalytic activity and structure of the nanoreactor are maintained after five constant cycles.

**Fig. S1.** (a) SEM image of HMSiO<sub>2</sub>@C. (b) TEM image of HMSiO<sub>2</sub>@C. (c) The digital image of SiO<sub>2</sub>@RF. (d) The digital image of HMSiO<sub>2</sub>@C.

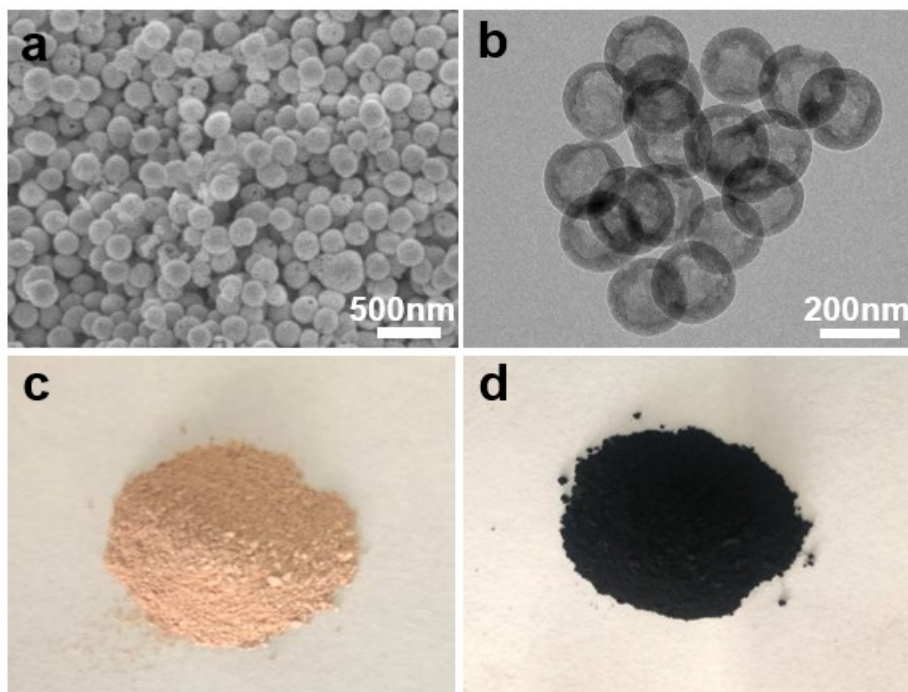

**Fig. S2.** (a) SEM image of AmHMSiO<sub>2</sub>@C. (b) TEM image of AmHMSiO<sub>2</sub>@C. (c) SEM image of PMo<sub>12</sub>/AmHMSi@C. (d) TEM image of PMo<sub>12</sub>/AmHMSi@C.

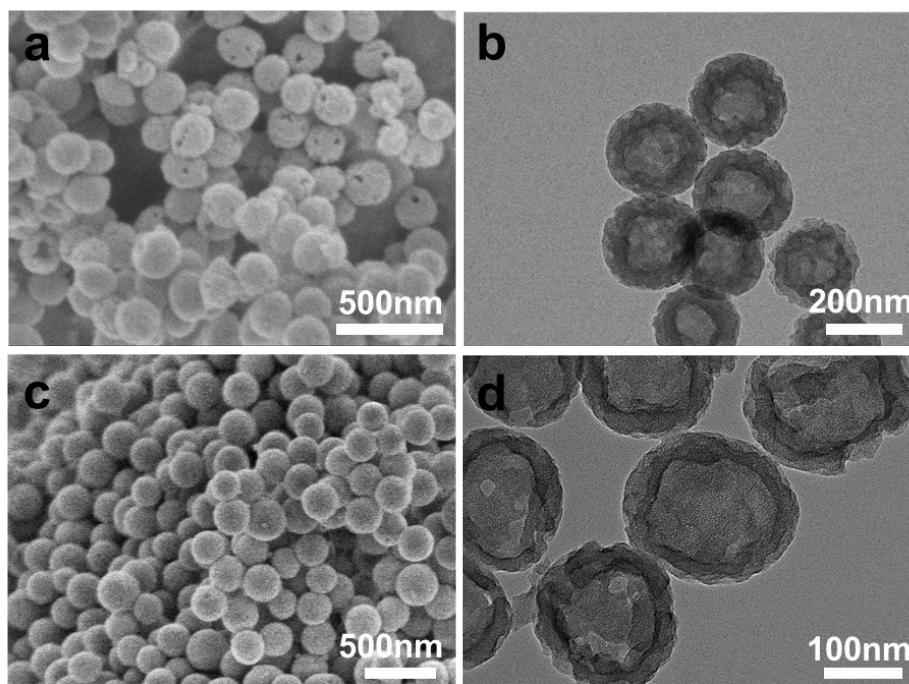

**Fig.S3.** The IR spectra of SiO<sub>2</sub>@C and Modify-SiO<sub>2</sub>@C

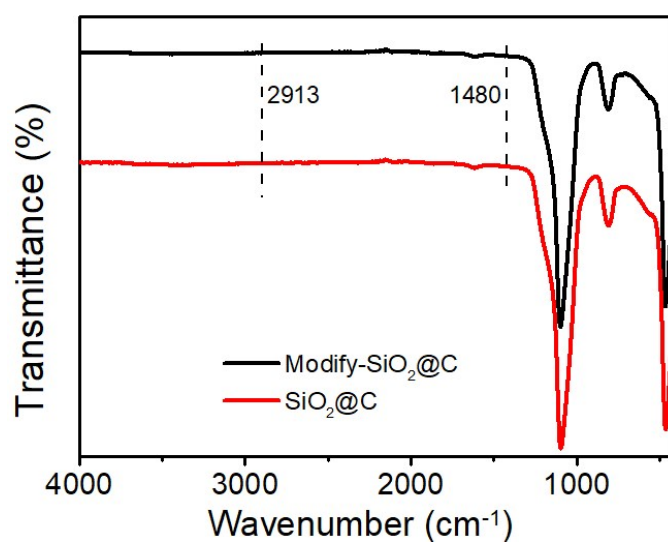

**Fig. S4** TG curves of HMSiO<sub>2</sub>@C, AmHMSiO<sub>2</sub>@C, PMo<sub>12</sub>/AmHMSiO<sub>2</sub>@C and H<sub>3</sub>PMo<sub>12</sub>O<sub>40</sub>.

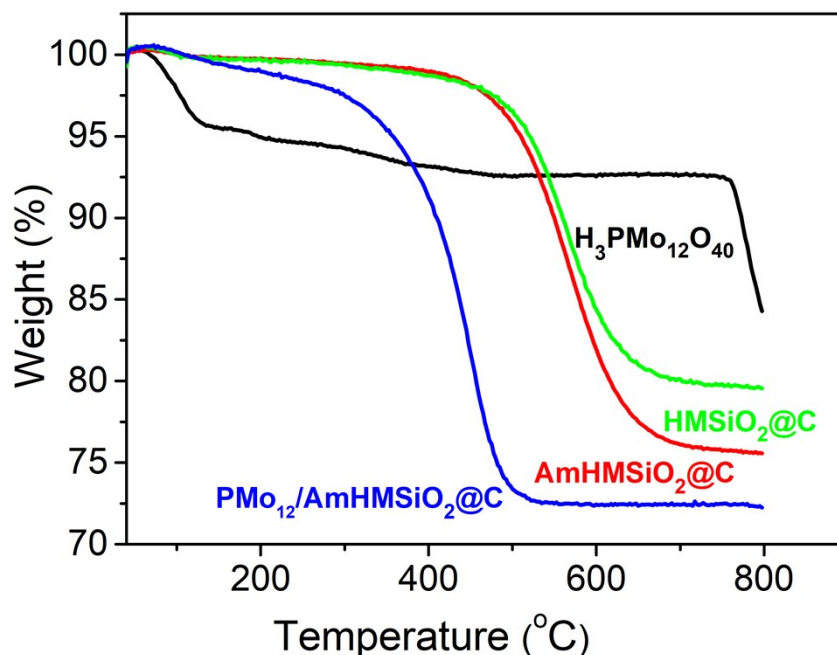

According to the ICP and element analysis results, the loading amount of PMo<sub>12</sub> is about 20.1% and as a result the AmHMSiO<sub>2</sub>@C support accounts for 79.9% in PMo<sub>12</sub>/AmHMSiO<sub>2</sub>@C. According to the TG curves of AmHMSiO<sub>2</sub>@C support, the ratio of organosilanes and amorphous carbon to the SiO<sub>2</sub> is 1:2.9. Therefore, the weight percentage of SiO<sub>2</sub> = 79.9%\*(2.9/3.9) = 59.4%. The ratio of SiO<sub>2</sub> to amorphous carbon is 3.7:1, which is determined according to the TG curve of HMSiO<sub>2</sub>@C. Therefore, the weight percentage of amorphous carbon = 59.4%/3.7 = 16.0%. As a result, the weight percentage of organosilanes = 79.9% - 59.4% - 16.0% = 4.5%.

**Fig. S5.** (a) TEM image of  $\text{PMo}_{12}/\text{AmSSiO}_2$ . (b) The IR spectra of  $\text{PMo}_{12}$  and  $\text{PMo}_{12}/\text{AmSSiO}_2$ .

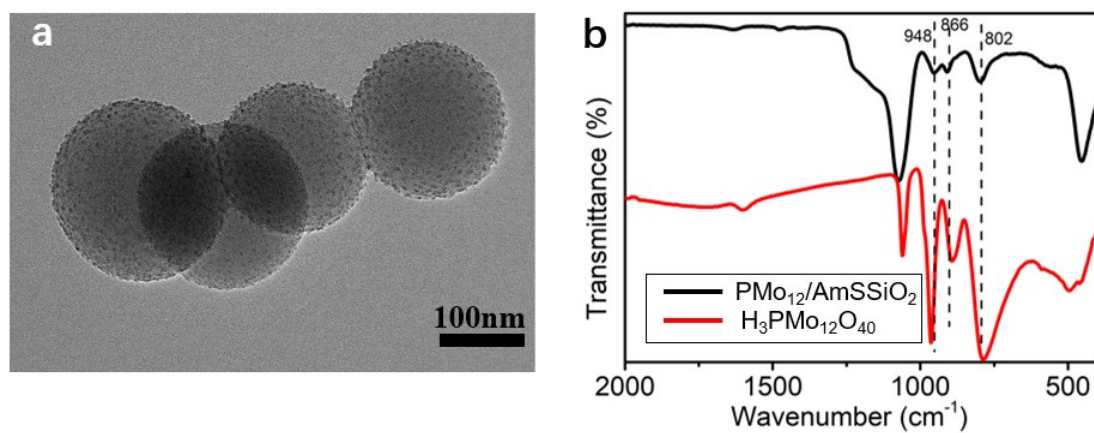

**Fig. S6.** (a) TEM image of  $\text{PMo}_{12}/\text{AmSMSiO}_2@\text{C}$ . (b) The IR spectra of  $\text{PMo}_{12}/\text{AmSMSiO}_2@\text{C}$  and  $\text{PMo}_{12}$ .

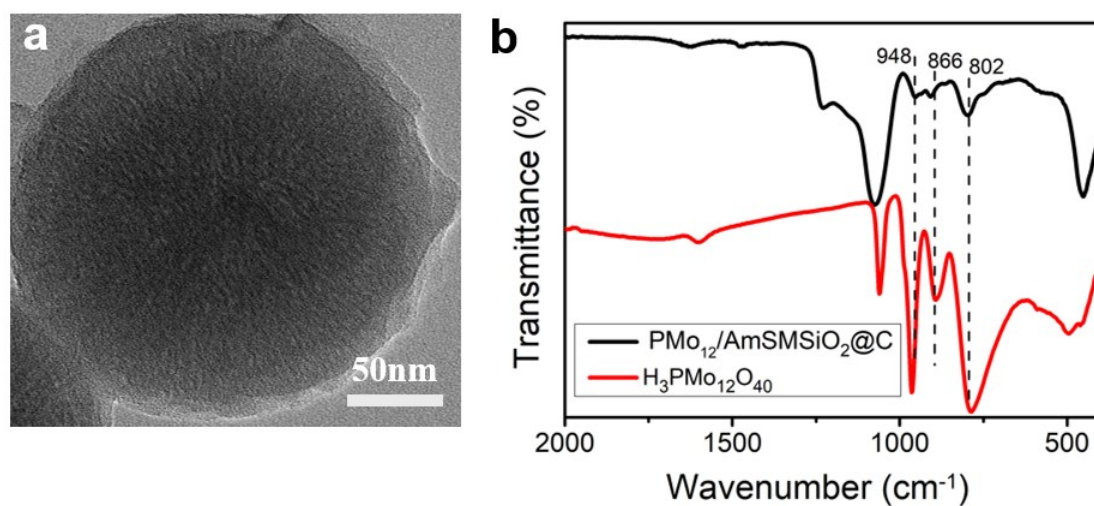

**Fig. S7.** (a) TEM image of  $\text{PMo}_{12}/\text{HMSiO}_2@\text{C}$ . (b) The IR spectra of  $\text{PMo}_{12}/\text{HMSiO}_2@\text{C}$  and

$\text{PMo}_{12}$ .

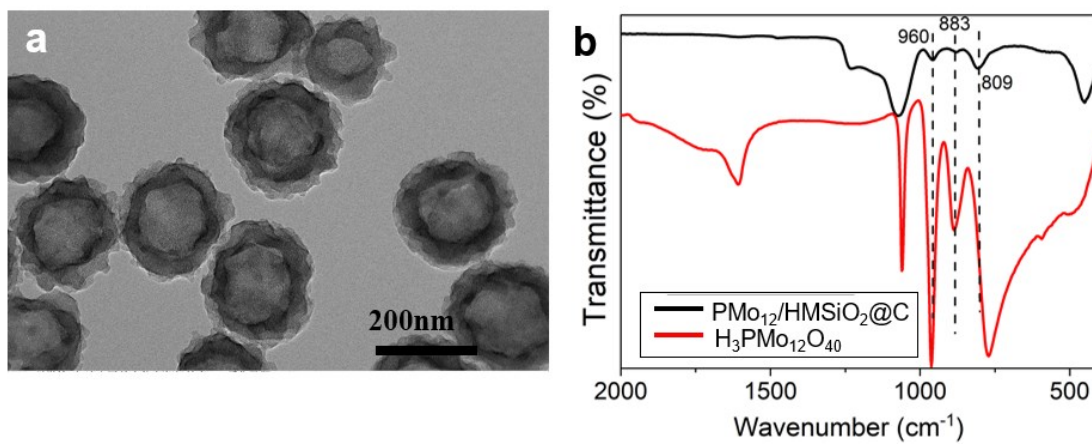



**Fig. S8.** XPS spectrum of  $\text{PMo}_{12}/\text{AmHMSiO}_2@\text{C}$  nanoreactor.

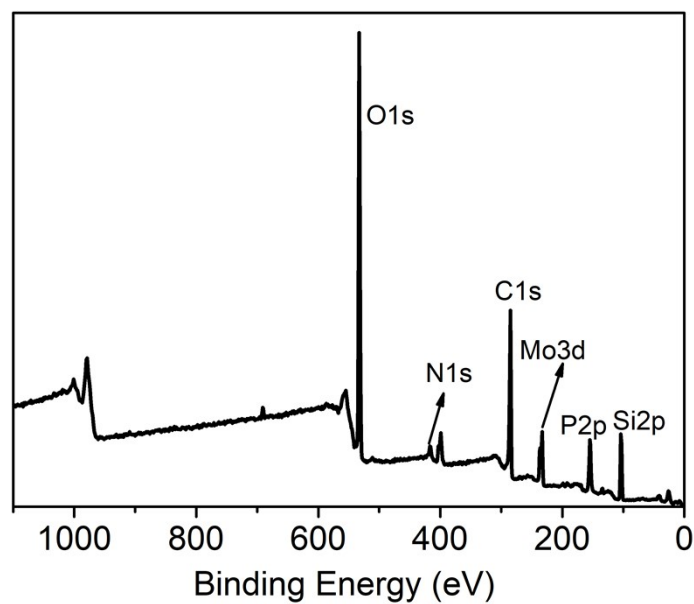

**Fig. S9.** (a) Concentration-time-course plot for DBT oxidation with different concentration of DBT.

Reaction conditions:  $\text{PMo}_{12}/\text{AmHMSiO}_2@\text{C}$  (0.002 mmol), 30%  $\text{H}_2\text{O}_2$  (0.15 mmol), n-octane (2 mL) containing DBT (100, 200, or 300 ppm), acetonitrile (2 mL) at 40 °C for 15 min.

(b) Concentration-time-course plot for DBT oxidation with different amount of  $\text{H}_2\text{O}_2$ . Reaction conditions:  $\text{PMo}_{12}/\text{AmHMSiO}_2@\text{C}$  (0.002 mmol), 30%  $\text{H}_2\text{O}_2$  (0.05, 0.10, 0.15 or 0.20 mmol), n-octane (2 mL) containing DBT (800 ppm), acetonitrile (2 mL) at 40 °C for 20 min.

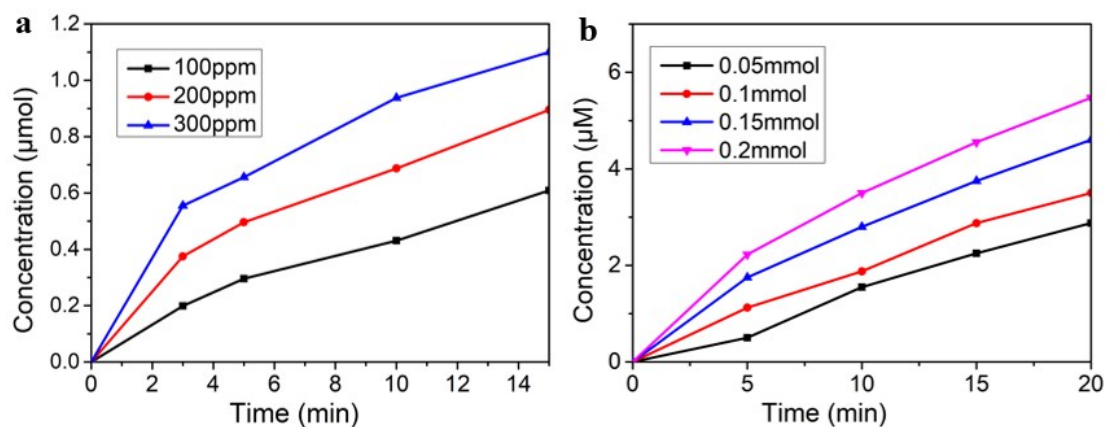

## Notes and references

1. Y. Q. Zhang and R. Wang, *Appl. Catal. B Environ.*, 2018, **234**, 247-259.
2. J. M. Fraile, C. Gil, J. A. Mayoral, B. Muel, L. Roldan, E. Vispe, S. Calderon and F. Puente, *Appl. Catal. B Environ.*, 2016, **180**, 680-686.
3. M. Vigolo, S. Borsacchi, A. Soraru, M. Geppi, B. M. Smarsly, P. Dolcet, S. Rizzato, M. Carraro and S. Gross, *Appl. Catal. B Environ.*, 2016, **182**, 636-644.
4. J. K. Li, J. Dong, C. P. Wei, S. Yang, Y. N. Chi, Y. Q. Xu and C. W. Hu, *Inorg. Chem.*, 2017, **56**, 5748-5756.
5. D. Juliao, A. C. Gomes, M. Pillinger, R. Valenca, J. C. Ribeiro, B. de Castro, I. S. Goncalves, L. Cunha Silva and S. S. Balula, *Eur. J. Inorg. Chem.*, 2016, DOI: 10.1002/ejic.201600442, 5114-5122.
6. M. Craven, D. Xiao, C. Kunstmann-Olsen, E. F. Kozhevnikova, F. Blanc, A. Steiner and I. V. Kozhevnikov, *Appl. Catal. B Environ.*, 2018, **231**, 82-91.
